# Supplementary material for: A novel viologen-based hybrid crystalline material for photochromic glass films, information storage and anti-counterfeiting
Source: Royal Society of Chemistry journal article supplement (doi:10.1039/d4dt02513j), 2024-01-01
Supplement: d4dt02513j1.pdf [file d4dt02513j1.pdf]

## Supporting Information

### A novel viologen-based hybrid crystalline material for photochromic glass film, information storage and anti-counterfeiting

Yang-Tao Yu, Shu-Hao Li, Zhuo-Yu Li, Jian-Ge Zeng, Chun-Jie Liu, Li Li\*

*School of Materials Science and Engineering, Henan Polytechnic University, Jiaozuo 454000, China.*

\*Corresponding author E-mail: lili@hpu.edu.cn (L. Li)

### Table of contents

**Fig. S1** TGA curve of compound **1** was investigated using powder samples under N<sub>2</sub>. The weight loss is 5.5 % up to 173 °C corresponding to the loss of one free H<sub>2</sub>O and one coordinated H<sub>2</sub>O.

**Fig. S2** PXRD pattern of compound **1** at different pH.

**Fig. S3** Photochromic behaviors of compound **1**. Label: **1a**: initial sample before photo irradiation; **1b-P**: the irradiated sample; **1b-P'**: the decolorated samples irradiated again.

**Fig. S4** IR spectra of compound **1** in different states. Label: **1a**: initial sample before photo irradiation; **1b-P**: the irradiated sample.

**Fig. S5** PXRD patterns of compound **1** in different states. Label: **1a**: initial sample before photo irradiation; **1b-P**: the irradiated sample; **simulated**: PXRD simulation of the compound.

**Fig. S6** The discoloration of photochromic glass under ultraviolet light.

**Fig. S7** Printing effect and effective retention time of two-dimensional code information storage on photochromic glass.

**Fig. S8** Number of cycles for information storage on glass film.

**Fig. S9** Ink-free printing effect of compound **1** under visible and ultraviolet light irradiation at the same time.

**Fig. S10** (a) PXRD patterns of compound **1** after fumigation with different amines; (b) Infrared spectra of **1** after fumigation with different amines.

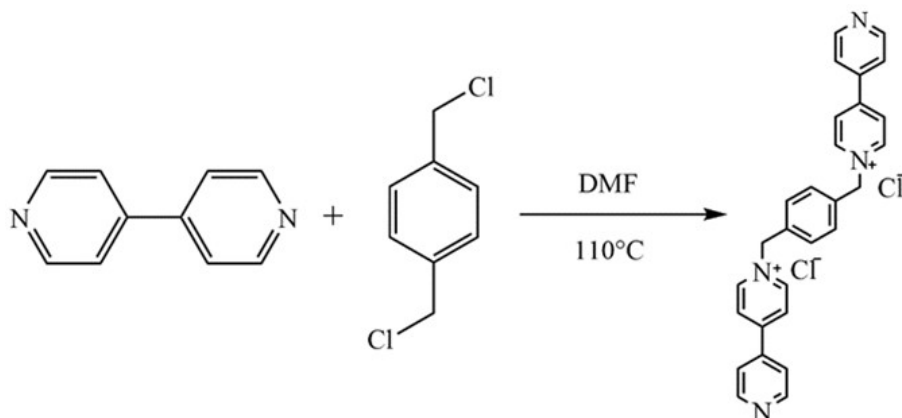

**Scheme 1.** The synthesis scheme of viologen ligand pbpy·2Cl.

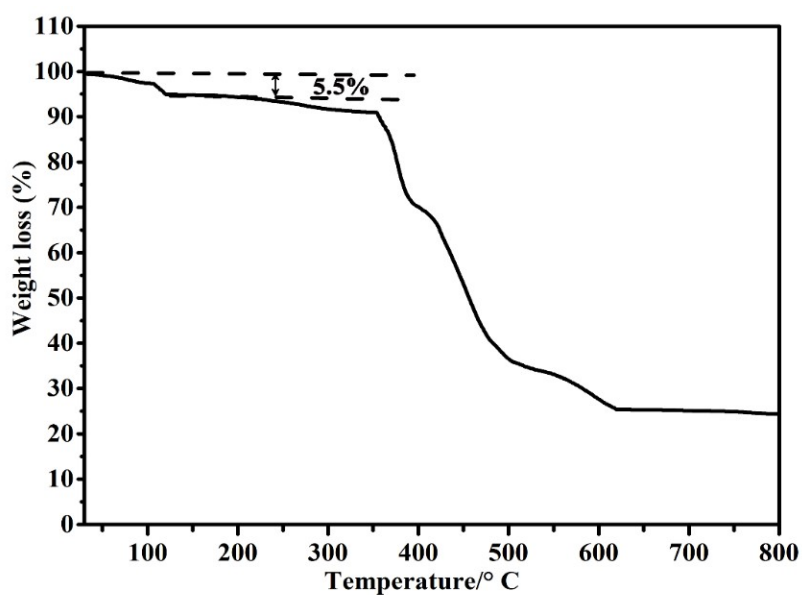

**Fig. S1** TGA curve of compound **1** was investigated using powder samples under N<sub>2</sub>. The weight loss is 5.5 % up to 173 °C corresponding to the loss of one free H<sub>2</sub>O and one coordinated H<sub>2</sub>O.

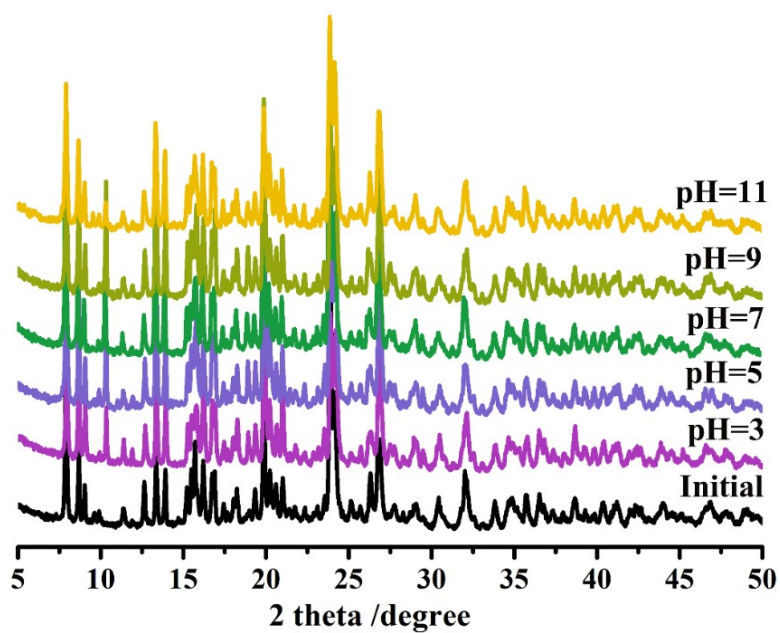

Fig. S2 PXRD pattern of compound 1 at different pH.

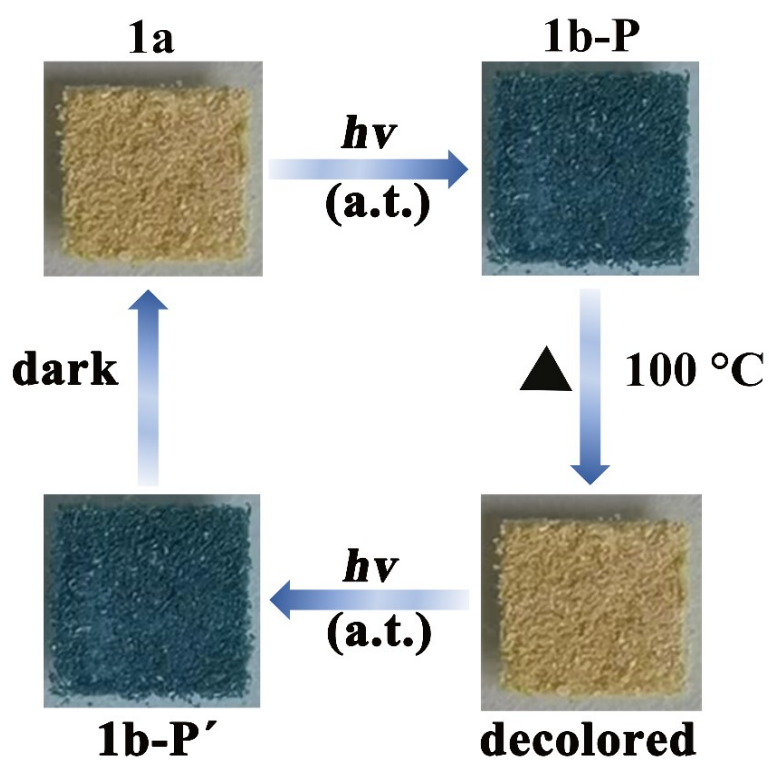

Fig. S3 Photochromic behaviors of compound 1. Label: **1a**: initial sample before photo irradiation; **1b-P**: the irradiated sample; **1b-P'**: the decolored samples irradiated again.

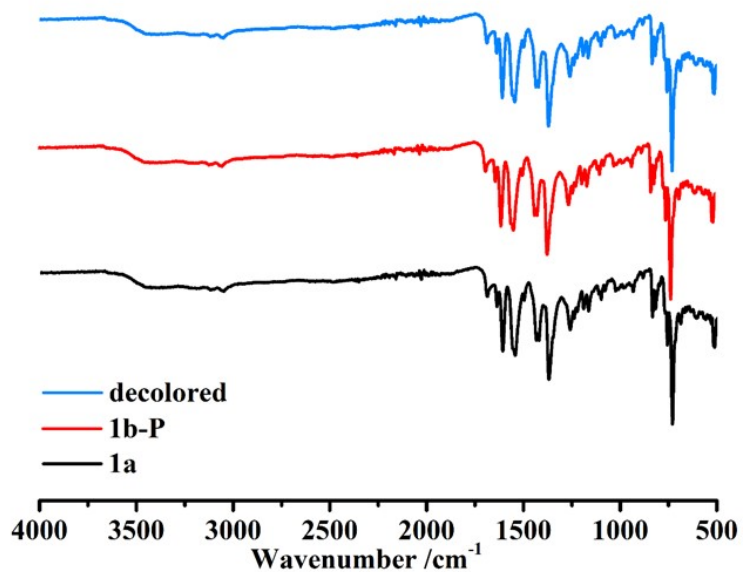

**Fig. S4** IR spectra of compound **1** in different states. Label: **1a**: initial sample before photo irradiation; **1b-P**: the irradiated sample.

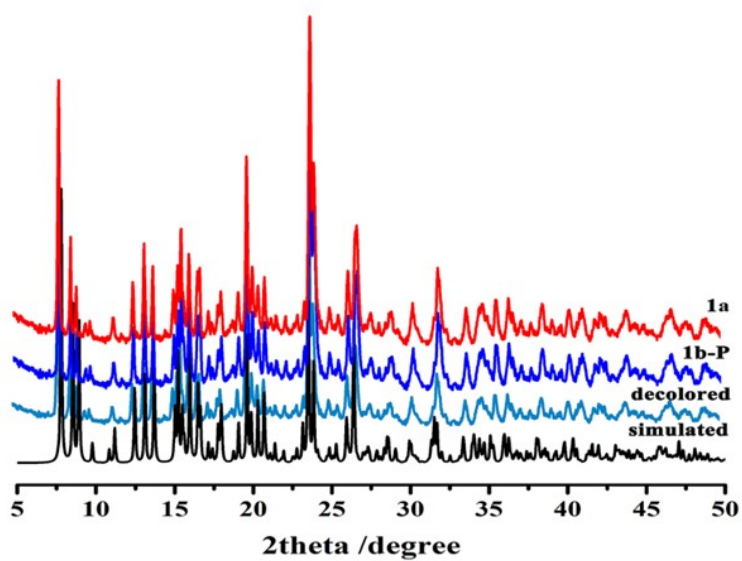

**Fig. S5** PXRD patterns of compound **1** in different states. Label: **1a**: initial sample before photo irradiation; **1b-P**: the irradiated sample; **simulated**: PXRD simulation of the compound.

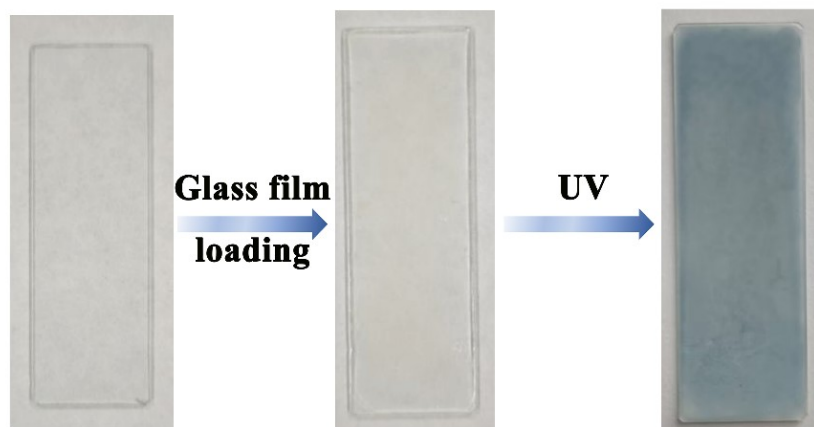

**Fig. S6** The discoloration of photochromic glass under ultraviolet light.

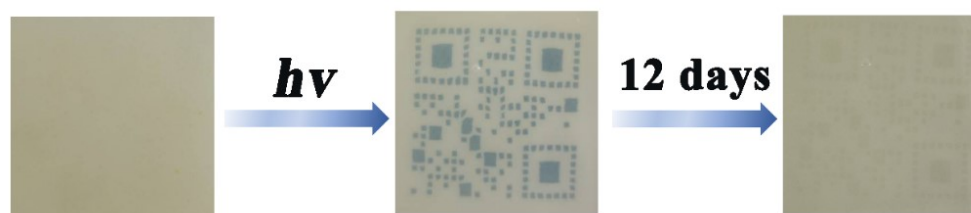

**Fig. S7** Printing effect and effective retention time of two-dimensional code information storage on photochromic glass.

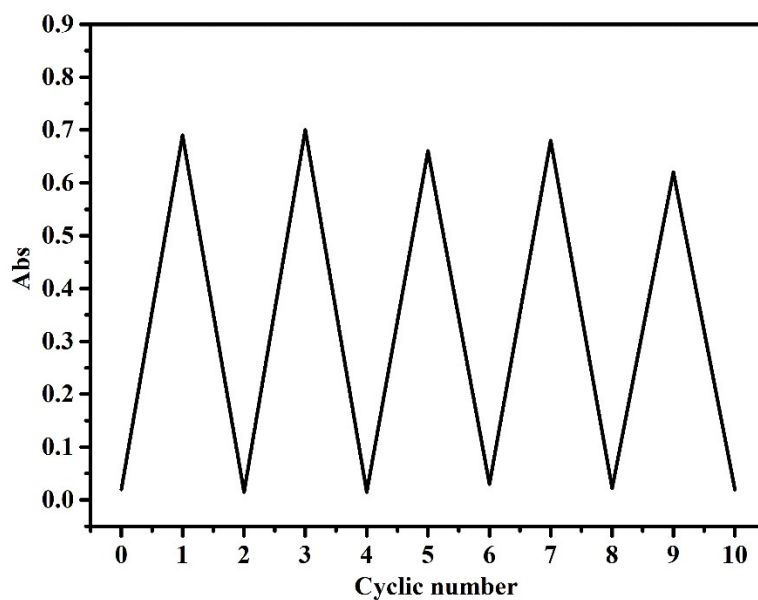

**Fig. S8** Number of cycles for information storage on glass film.

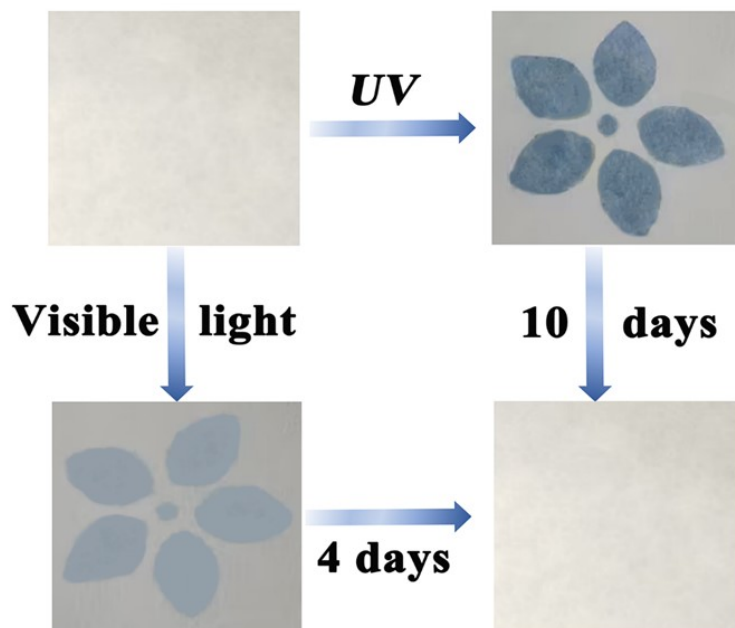

**Fig. S9** Ink-free printing effect of compound **1** under visible and ultraviolet light irradiation at the same time.

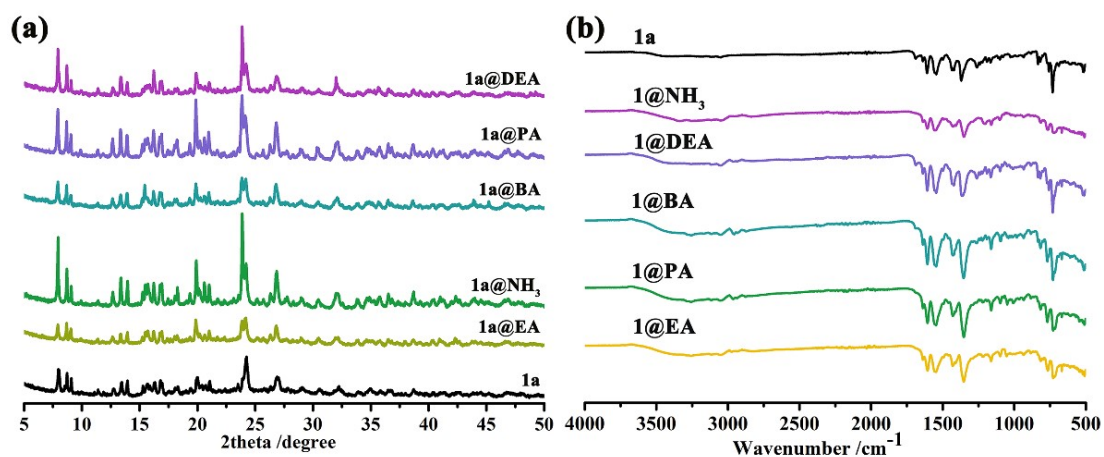

**Fig. S10** (a) PXRD patterns of compound **1** after fumigation with different amines; (b) Infrared spectra of **1** after fumigation with different amines.

**Table S1.** Comparison of properties of **1** with existing photochromic materials

| Compound                                                                                                          | Response rate | Application performance                                                                                        | Fading time | Reference |
|-------------------------------------------------------------------------------------------------------------------|---------------|----------------------------------------------------------------------------------------------------------------|-------------|-----------|
| 1                                                                                                                 | 1 s           | Waterproof photochromic glass film<br>Amine-selective detection<br>Information storage and anti-counterfeiting | 10 days     |           |
| [Zn <sub>4</sub> (BTC) <sub>3</sub> (bcbpy) <sub>2</sub> ] $\cdot$ 5H <sub>2</sub> O                              | 5 s           | The detection of benzenes and NO <sub>2</sub> <sup>-</sup>                                                     | /           | a         |
| [Cd(bcbpy)Cl <sub>2</sub> ] $\cdot$ H <sub>2</sub> O                                                              | 30 s          | The sensing of organic amines and benzenes                                                                     | /           | b         |
| {[Cd <sub>2</sub> (bcbp)(pta) <sub>2</sub> (H <sub>2</sub> O)] $\cdot$ 2H <sub>2</sub> O} <sub>n</sub>            | 20 min        | Detection of MnO <sub>4</sub> <sup>-</sup><br>Chemochromism                                                    | 6 h         | c         |
| [Cd <sub>2</sub> (bcbpy)(m-BDC) <sub>2</sub> (H <sub>2</sub> O) <sub>4</sub> ] $\cdot$ 5H <sub>2</sub> O          | 30 s          | Inkless and erasable prints<br>Amine-selective sensing                                                         | 2 days      | d         |
| (H <sub>2</sub> AV)[H <sub>2</sub> (P <sub>2</sub> W <sub>18</sub> O <sub>62</sub> )] $\cdot$ 9.5H <sub>2</sub> O | 30 s          | Raman spectroscopy detection of EDA                                                                            | 7 days      | e         |
| [Zn(bcbpy) <sub>0.5</sub> (pma) <sub>0.5</sub> (H <sub>2</sub> O)] $\cdot$ 3H <sub>2</sub> O                      | /             | Amine detection<br>Ultraviolet light detection<br>Inkless and erasable prints                                  | 18 h        | f         |
| Zn (CV) <sub>0.5</sub> $\cdot$ (BDC) <sub>0.5</sub> $\cdot$ Br                                                    | 5 s           | Smart window<br>Inkless and erasable printing<br>Anti-counterfeiting applications                              | 6 days      | g         |

## Reference

- J. Zou, J. Ji, M. Fan, J. Li, H. Wang and G.-D. Li, *Dalton Trans.*, 2021, 50, 10237–10242.
- H. Wang, Z. Tu and H. Zhang, *Dalton Trans.*, 2019, 48, 17852–17857.
- X. Zhou, Y. Li, X. Li, S. Du, Y. Yang, K. Xiong, Y. Xie, X. Shi and Y. Cai, *Inorg. Chem.*, 2022, 61, 11687–11694.
- Y. Hua, N.-N. Zhang, M.-K. Wang, S.-Q. Wang and L. Li, *Dyes Pigm.*, 2021, 194, 109595.
- X.-Z. Zhang, W.-J. Zhu, Z.-X. Yang, Y. Feng, L.-L. Fan, G.-G. Gao and H. Liu, *J. Mater. Chem. C*, 2022, 10, 15451–15457.
- L. Li, Z.-M. Tu, Y. Hua, X.-N. Li, H.-Y. Wang and H. Zhang, *Inorg. Chem.*

*Front.*, 2019, 6, 3077–3082.

- g. X.-N. Li, H. Xu, L. Huang, Y. Shen, M.-J. Li and H. Zhang, *Dyes Pigm.*, 2023, 213, 111151.

**Table S2.** Data response of compound **1** to different amines

| <b>Object</b>    | <b>Response time</b> | <b>Response condition</b> |
|------------------|----------------------|---------------------------|
| NH <sub>3</sub>  | 30 s                 | evident                   |
| EA               | 1 min                | evident                   |
| PA               | 3 min                | evident                   |
| BA               | 3 min                | light                     |
| DEA              | 5 min                | lighter                   |
| Dipropylamine    | no                   | no                        |
| Triethylamine    | no                   | no                        |
| Tri-n-butylamine | no                   | no                        |



## Crystallographic Data

**Table S3.** Crystal Data and Structure Refinements for compound **1**

|                                                        |                                                                   |
|--------------------------------------------------------|-------------------------------------------------------------------|
| Empirical formula                                      | C <sub>23</sub> H <sub>20</sub> CdClN <sub>2</sub> O <sub>9</sub> |
| CCDC number                                            | 2222406                                                           |
| Formula weight                                         | 616.26                                                            |
| Temperature/K                                          | 273.15                                                            |
| Crystal system                                         | triclinic                                                         |
| Space group                                            | <i>P</i> $\bar{1}$                                                |
| <i>a</i> /Å                                            | 10.3601(9)                                                        |
| <i>b</i> /Å                                            | 11.2364(11)                                                       |
| <i>c</i> /Å                                            | 12.0547(12)                                                       |
| $\alpha$ /°                                            | 71.233(2)                                                         |
| $\beta$ /°                                             | 79.299(3)                                                         |
| $\gamma$ /°                                            | 74.139(3)                                                         |
| Volume/Å <sup>3</sup>                                  | 1270.7(2)                                                         |
| <i>Z</i>                                               | 2                                                                 |
| $\rho_{\text{calc}}$ g/cm <sup>3</sup>                 | 1.611                                                             |
| $\mu$ /mm <sup>-1</sup>                                | 1.018                                                             |
| F(000)                                                 | 618.0                                                             |
| Goodness-of-fit on F <sup>2</sup>                      | 1.034                                                             |
| Final R indexes [ <i>I</i> >= 2 $\sigma$ ( <i>I</i> )] | R <sub>1</sub> = 0.0463, wR <sub>2</sub> = 0.1221                 |
| Final R indexes [all data]                             | R <sub>1</sub> = 0.0516, wR <sub>2</sub> = 0.1257                 |

**Table S4.** Important bond lengths of compound **1**

| Bond    | Length/Å   | Bond   | Length/Å |
|---------|------------|--------|----------|
| Cd1-Cl1 | 2.5315(14) | Cd1-O2 | 2.434(3) |
| Cd1-N1  | 2.413(4)   | Cd1-O6 | 2.488(3) |
| Cd1-O3  | 2.369(3)   | C1-C5  | 1.527(5) |
| Cd1-O4  | 2.439(3)   | C1-O1  | 1.274(5) |
| C11-N1  | 1.362(6)   | C14-N1 | 1.360(5) |
| C10-O2  | 1.270(5)   | C10-O6 | 1.280(5) |

**Table S5.** Important bond angles of compound 1

| Bond Angles | Angle/°    | Bond Angles | Angle/°  |
|-------------|------------|-------------|----------|
| N1-Cd1-Cl1  | 165.43(10) | O4-Cd1-Cl1  | 88.66(8) |
| N1-Cd1-O2   | 86.67(12)  | O2-C10-O6   | 121.4(4) |
| N1-Cd1-O4   | 81.67(11)  | N1-C11-C7   | 123.4(4) |
| N1-Cd1-O6   | 95.83(12)  | C11-N1-Cd1  | 123.3(3) |
| O3-Cd1-Cl1  | 99.49(9)   | C14-N1-C11  | 116.7(4) |
| O3-Cd1-N1   | 82.48(12)  | C14-N1-Cd1  | 118.0(3) |
| O3-Cd1-O2   | 82.53(10)  | C1-O3-Cd1   | 100.8(2) |
| O3-Cd1-O4   | 144.21(10) | C10-O6-Cd1  | 91.0(2)  |
